# Supplementary material for: Dopamine amperometric detection at a ferrocene clicked PEDOT:PSS coated electrode
Source: Royal Society of Chemistry journal article supplement (doi:10.1039/c4tb00169a), 2014-01-01
Supplement: c4tb00169a1.pdf [file c4tb00169a1.pdf]

### Characterization of 2-Chloromethyl-2,3-dihydrothieno[3,4-b][1,4]dioxine (EDOT-Cl)

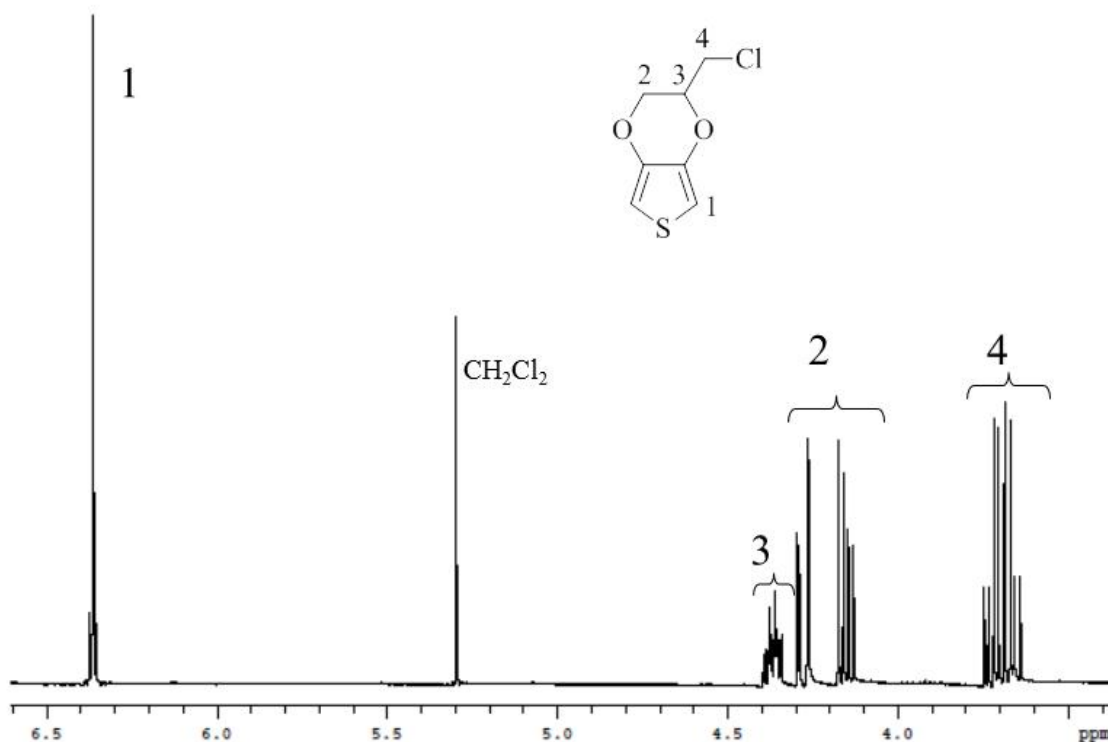

**Figure 1S.** <sup>1</sup>H-NMR spectrum in CDCl<sub>3</sub> (400 MHz) of 2-Chloromethyl-2,3-dihydrothieno[3,4-b][1,4]dioxine (EDOT-Cl)

<sup>1</sup>H NMR (CDCl<sub>3</sub>): δ = 6.37 (m, 2H, CHS), 4.36 (m, 1H, CH-O), 4.29 (dd, J<sub>1</sub>= 12.0 Hz, J<sub>2</sub>= 2.4 Hz, 1H, CH<sub>2</sub>-O) 4.15 (dd, J<sub>1</sub>= 12.0 Hz, J<sub>2</sub>= 6.0 Hz, 1H, CH<sub>2</sub>-O), 3.72 (dd, J<sub>1</sub>= 11.6 Hz, J<sub>2</sub>= 5.2 Hz, 1H, CH<sub>2</sub>-Cl), 3.66 (dd, J<sub>1</sub>= 11.6 Hz, J<sub>2</sub>= 7.2 Hz, 1H, CH<sub>2</sub>-Cl); <sup>13</sup>C NMR (CDCl<sub>3</sub>): δ = 141.16, 140.71, 100.12, 100.11, 72.84, 65.55, 41.31.

### Detail on synthesis and characterization of 2-Azidomethyl-2,3-dihydro-thieno[3,4-b][1,4]dioxine (EDOT-N<sub>3</sub>)

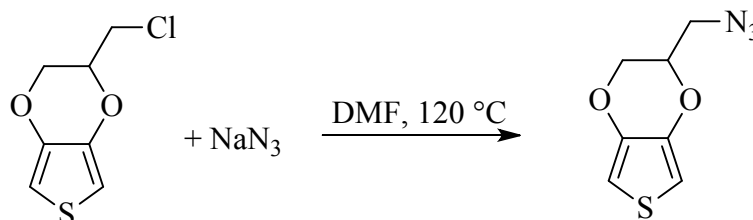

Sodium azide (176,8 mg, 2,72 mmol) was added to a solution of 2-Chloromethyl-2,3-dihydrothieno[3,4-b][1,4]dioxine (EDOT-Cl) (258 mg, 1,36 mmol) in DMF (15 mL) under nitrogen atmosphere. The reaction mixture was stirred at 120°C for 3h. The solvent was removed under

vacuum and the residual sodium azide removed adding 30 mL of water subsequently extracted with diethylether (3 x 30 mL). The organic fractions were washed with water (30 mL) and dried on sodium sulfate. Removing the solvent under vacuum 2-Azidomethyl-2,3-dihydro-thieno[3,4-b][1,4] dioxine (EDOT-N<sub>3</sub>) was obtained as a yellow oil (yield = 95%)

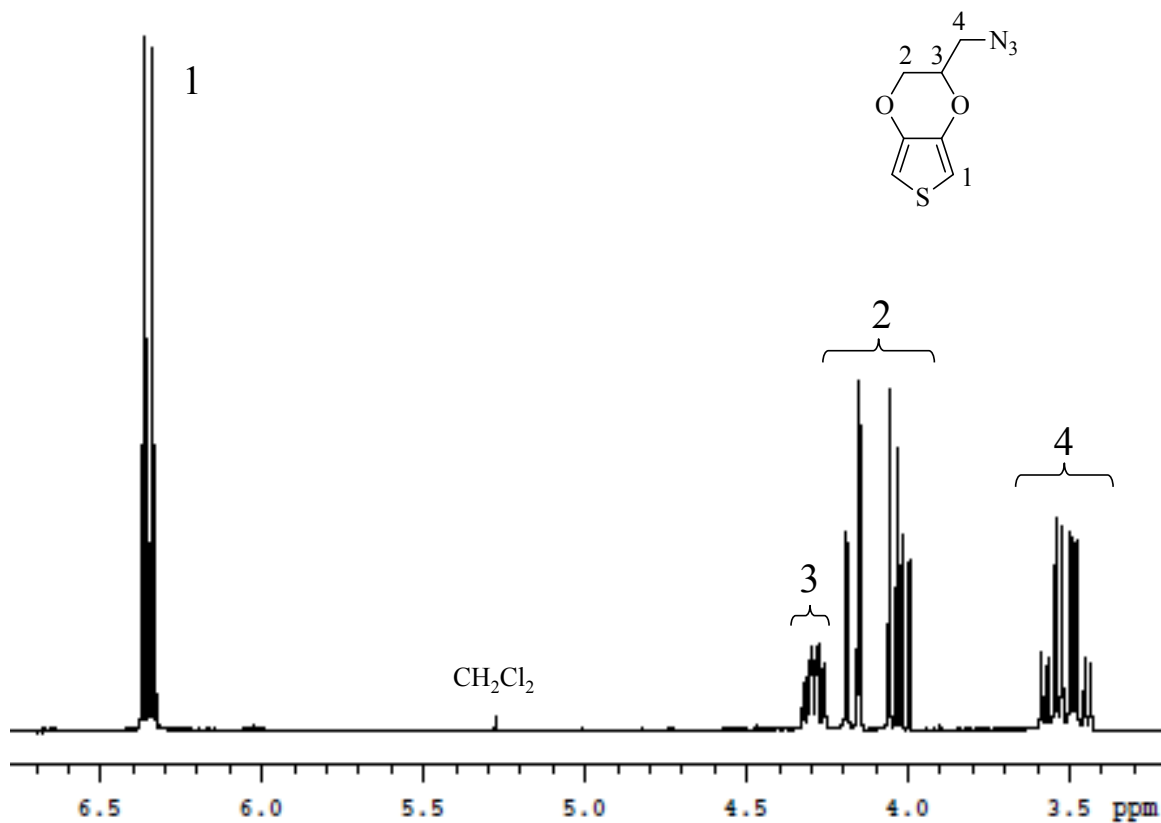

**Figure 2S.** <sup>1</sup>H-NMR spectrum in CDCl<sub>3</sub> (400 MHz) of 2-Azidomethyl-2,3-dihydro-thieno[3,4-b][1,4] dioxine (EDOT-N<sub>3</sub>)

<sup>1</sup>H-NMR (CDCl<sub>3</sub>, 300MHz): 6.36 (AB-system,  $J_{AB} = 3.7$  Hz, 2H, CH-S), 4.30 (m, 1H, CH-O), 4.18 (dd,  $J_1=11.7$  Hz,  $J_2= 2.3$  Hz, 1H, CH<sub>2</sub>-O), 4.04 (dd,  $J_1= 11.7$  Hz,  $J_2= 6.9$  Hz, 1H, CH<sub>2</sub>-O), 3.56 (dd,  $J_1= 13.1$  Hz,  $J_2= 6.0$  Hz, 1H, CH<sub>2</sub>-N<sub>3</sub>), 3.47 (dd,  $J_1= 13.1$  Hz,  $J_2= 5.2$  Hz, 1H, CH<sub>2</sub>-N<sub>3</sub>); <sup>13</sup>C NMR (CDCl<sub>3</sub>):  $\delta = 141.0, 140.6, 100.21, 100.04, 72.4, 65.7, 50.5$ .
